# Supplementary material
Source: Research Square preprint supplement (doi:10.21203/rs.3.rs-9075116/v1)
Supplement: Supplementary file 1 [file 52d6a59dfb182beef68afb40.docx]

**Studying the role of aprotic and protic solvents on extremophilic laccase from *Thermus thermophilus* for solvent-mediated one-pot biocatalysis**

Rokesh Radhakrishnan1, 2 #

*1P. K. Sinha Centre for Bioenergy and Renewables, Indian Institute of Technology Kharagpur,*

*West Bengal, India-721302*

*2Lehrstuhl für Biotechnologie, Rheinisch-Westfälische Technische Hochschule Aachen University, Worringerweg 3, Aachen, Germany-52074*

**#Corresponding author**

Rokesh Radhakrishnan, Ph. D
***Researcher***

*1P. K. Sinha Centre for Bioenergy and Renewables, Indian Institute of Technology Kharagpur, West Bengal, India-721302*

*2Lehrstuhl für Biotechnologie, Rheinisch-Westfälische Technische Hochschule Aachen University, Worringerweg 3, Aachen, Germany-52074*

Email: [rokesh2012@iitkgp.ac.in](mailto:rokesh2012@iitkgp.ac.in); [rokesh2012@gmail.com](mailto:rokesh2012@gmail.com)

**Supplementary Information:**


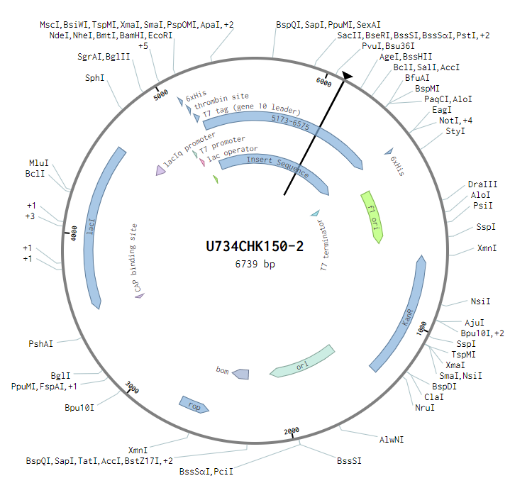


**Fig. S1.**  Plasmid map of pET-28a+ TtL


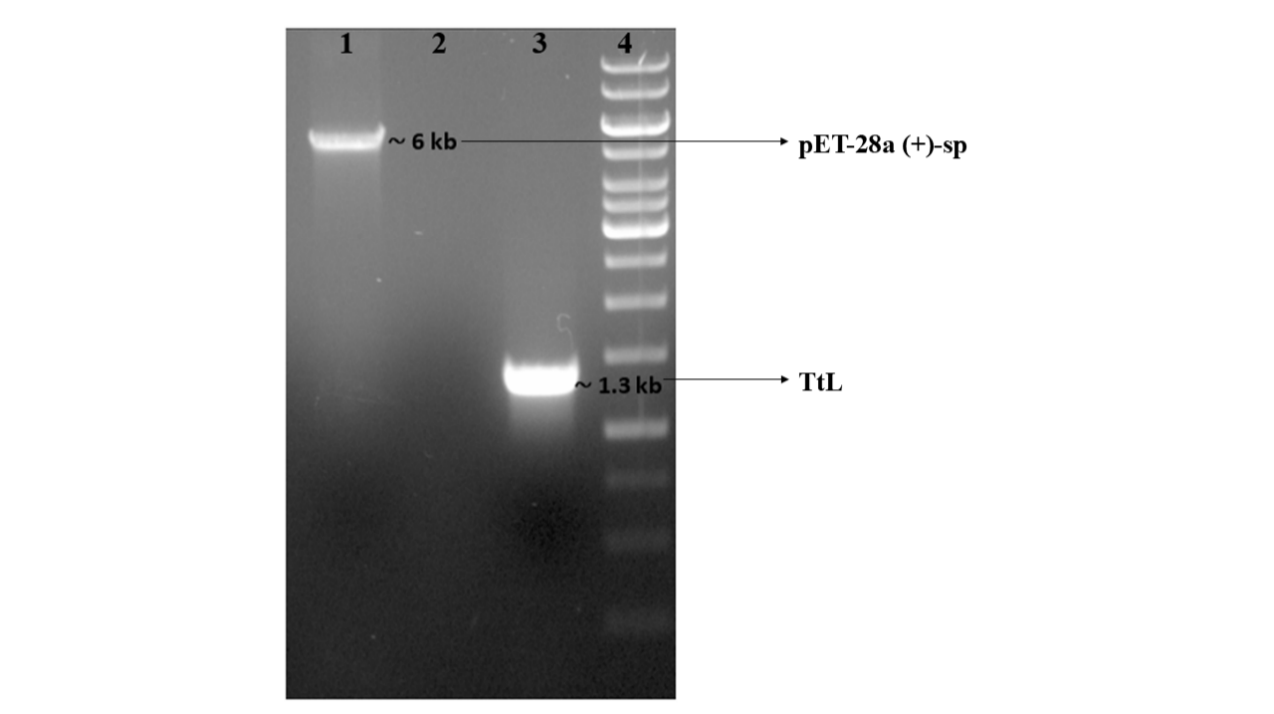


**Fig. S2.**  Construction of sp-TtL


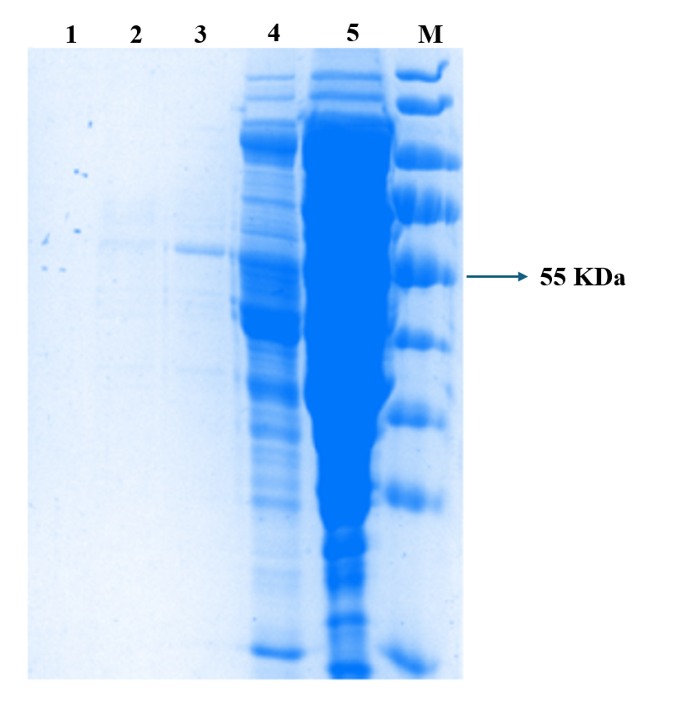


**Fig. S3.** Purification of *T. thermophilus* Laccase ion-exchange chromatography technique (Lane1: Fraction 2, Lane 2: Fraction 1, Lane 3: 2nd wash, Lane 4: 1st Wash, Lane 5: Cell lysate, and Lane 6: Marker)


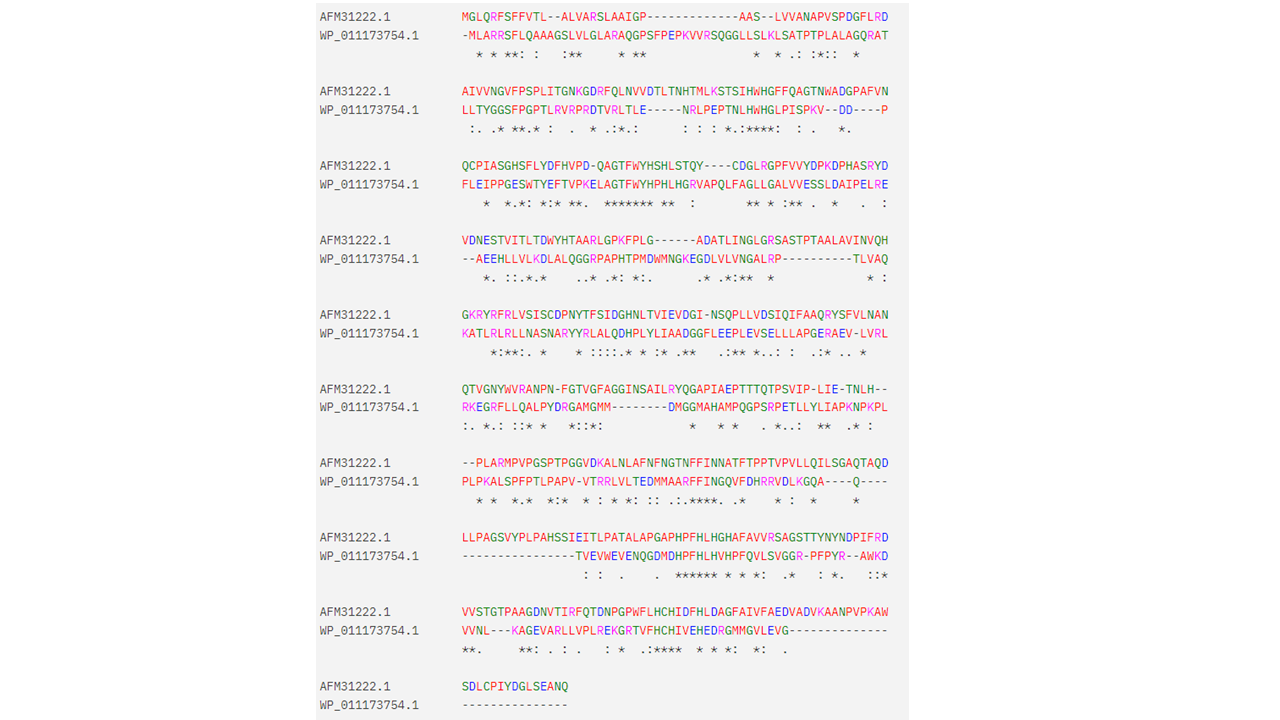
**Fig. S4.** CLUSTAL O (1.2.4) multiple sequence alignment, *Thermus thermophilus* HB27 (accession no. WP_011173754) and *Trametes versicolor* (accession no. AFM31222), conserved sequence (*), conservative mutations (:), semi-conservative mutations (.), and non-conservative mutations ().


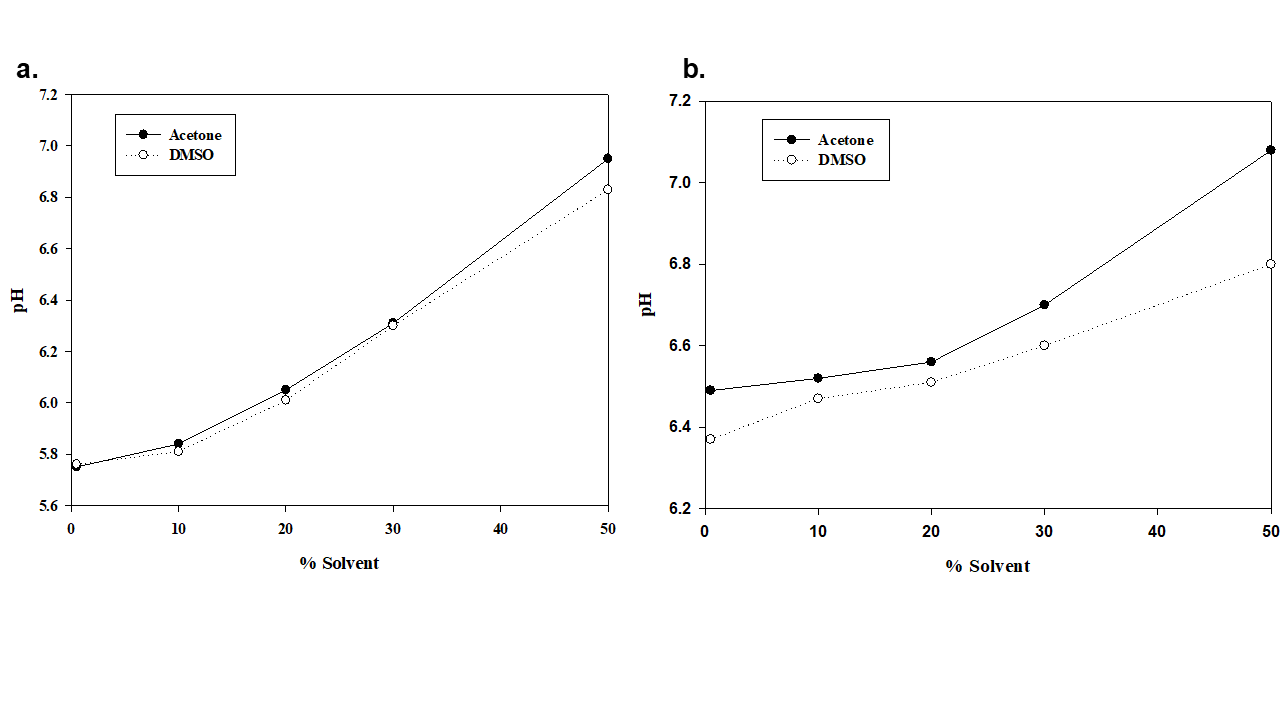


**Fig. S5.** Influence of a. solvent-sodium acetate buffer and b. solvent-water mixture on pH

**Table. S1.** Amino acid sequence of TtL, nsTtL and spTtL

| **TtL**  MLARRSFLQAAAGSLVLGLARAQGPSFPEPKVVRSQGGLLSLKLSATPTPLAIAGQRATLLTYGGSFPGPTLRVRPRDTVRLTLENRLPEPTNLHWHGLPISPKVDDPFLEIPPGESWTYEFTVPKELAGTFWYHPHLHGRVAPQLFAGLLGALVVESSLDAIPELREAEEHLLVLKDLALQGGRPAPHTPMDWMNGKEGDLVLVNGALRPTLVAQKATLRLRLLNASNARYYRLALQDHPLYLIAADGGFLEEPLEVSELLLAPGERAEVLVRLRKEGRFLLQALPYDRGAMGMMDMGGMAHAMPQGPSRPETLLYLIAPKNPKPLPLPKALSPFPTLPAPVVTRRLVLTEDMMAARFFINGQVFDHRRVDLKGQAQTVEVWEVENQGDMDHPFHLHVHPFQVLSVGGRPFPYRAWKDVVNLKAGEVARLLVPLREKGRTVFHCHIVEHEDRGMMGVLEVG |
| --- |
| **nsTtL**  GPSFPEPKVVRSQGGLLSLKLSATPTPLALAGQRATLLTYGGSFPGPTLRVRPRDTVRLTLENRLPEPTNLHWHGLPISPKVDDPFLEIPPGESWTYEFTVPKELAGTFWYHPHLHGRVAPQLFAGLLGALVVESSLDAIPELREAEEHLLVLKDLALQGGRPAPHTPMDWMNGKEGDLVLVNGALRPTLVAQKATLRLRLLNASNARYYRLALQDHPLYLIAADGGFLEEPLEVSELLLAPGERAEVLVRLRKEGRFLLQALPYDRGAMGMMDMGGMAAMPQGPSRPETLLYLIAPKNPKPLPLPKALSPFPTLPAPVVTRRLVLTEDMMAARFFINGQVFDHRRVDLKGQAQTVEVWEVENQGDMDHPFHLHVHPFQVLSVGGRPFPYRAWKDVVNLKAGEVARLLVPLREKGRTVFHCHIVEHEDRGMMGVLEVG |
| **spTtL**  MQRRDFLKYSVALGVASALPLWSRAVFAGPSFPEPKVVRSQGGLLSLKLSATPTPLALAGQRATLLTYGGSFPGPTLRVRPRDTVRLTLENRLPEPTNLHWHGLPISPKVDDPFLEIPPGESWTYEFTVPKELAGTFWYHPHLHGRVAPQLFAGLLGALVVESSLDAIPELREAEEHLLVLKDLALQGGRPAPHTPMDWMNGKEGDLVLVNGALRPTLVAQKATLRLRLLNASNARYYRLALQDHPLYLIAADGGFLEEPLEVSELLLAPGERAEVLVRLRKEGRFLLQALPYDRGAMGMMDMGGMAHAMPQGPSRPETLLYLIAPKNPKPLPLPKALSPFPTLPAPVVTRRLVLTEDMMAARFFINGQVFDHRRVDLKGQAQTVEVWEVENQGDMDHPFHLHVHPFQVLSVGGRPFPYRAWKDVVNLKAGEVARLLVPLREKGRTVFHCHIVEHEDRGMMGVLEVGHHHHHH |

**Table. S2.** Primer information for amplification for the construction of nsTtL and spTtL

| **Sequences of oligonucleotides** | **Sequence (5ʹ > 3ʹ)** |
| --- | --- |
| **nsTtL**  Vector_Forward |  |
| CGCGGATCCGAATTC |
| Vector_Reverse | CGCGGATCCGAA |
| **spTtL**  TtL_forward |  |
| CAGTATTTGCGGGTCCGAGCTTCCCGGAGCCG |
| TtL_reverse | GGTGCTCGAGGCCAACTTCCAGAACGCCCATCATA |
| Vector_forward | GGAAGTTGGCCTCGAGCACCACCACCACCACCACTG |
| Vector_reverse | GCTCGGACCCGCAAATACTGCGCGGCTCCACAGCG |

**Table S3.** Melting temperature o *T. Thermophilus* laccase in DMSO and acetone

| **% v/v** | **Tm(°C) in DMSO** | **Tm(°C) in Acetone** |
| --- | --- | --- |
| 10% | 75.4 | 66.4 |
| 20% | 72.5 | 63.3 |
| 30% | 70 | 56.9 |
| 40% | 66.9 | 53 |
| 50% | 62.3 | - |
| 60% | 53.3 | 38.2 |
| 70% | 37.7 | 31.6 |
